# Supplementary material for: Enhancing D-lactic acid production from methane through metabolic engineering of Methylomonas sp. DH-1
Source: Springer Nature journal article supplement (doi:10.1186/s12934-025-02695-z), 2025-03-25
Supplement: MOESM1 [file 12934_2025_2695_MOESM1_ESM.pdf]

## Supplementary data

### Enhancing D-lactic acid production from methane through metabolic engineering of *Methylobomonas* sp. DH-1

## Supplementary Table

**Table S1.** D-LA production titer per cell mass depending on strains and culture conditions

| Strain | Culture                          | Culture time (h) | IPTG ( $\mu$ M) | D-LA Titer (g/L) /OD <sub>600</sub> |
|--------|----------------------------------|------------------|-----------------|-------------------------------------|
| JHM86  | Flask fed-batch                  | 96               | 0               | 0.28                                |
| JHM804 | Flask fed-batch                  | 96               | 0               | 0.13                                |
|        |                                  | 96               | 5               | 0.44                                |
|        |                                  | 96               | 10              | 0.88                                |
|        |                                  | 85               | 25              | 0.85                                |
| JHM805 | Flask fed-batch                  | 120              | 50              | 0.32                                |
|        | Bioreactor (w/o nitrate feeding) | 108              | 50              | 0.83                                |
|        | Bioreactor (w/ nitrate feeding)  | 108              | 50              | 0.65                                |

## Supplementary Figures

**A**

| Gene        | Definition                | Relative strength |
|-------------|---------------------------|-------------------|
| AYM39_19855 | 50S ribosomal protein L31 | 0.07              |
| <i>glgA</i> | Glycogen synthase         | 1                 |
| AYM39_17865 | Elongation factor Tu      | 1.5               |
| AYM39_02490 | Transaldolase             | 5.1               |
| AYM39_15615 | Methanol dehydrogenase    | 54.9              |

**B**

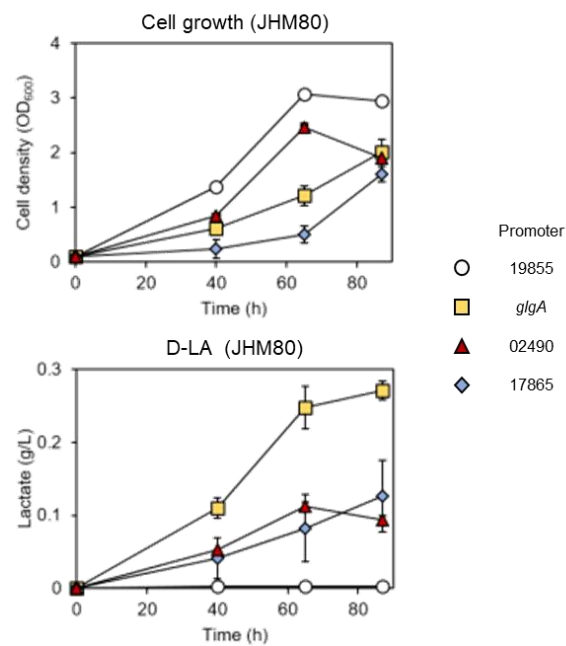

**Figure S1.** Effect of promoter strength of *LDH* expression integrated in JHM80 strain. **A.** Relative strength of five different constitutive promoters tested, based on the previously published data (1). **B.** Cell growth and LA production of JHM80 strains with LDH integrated under the indicated promoters. Error bars represent the standard deviations of two independent experiments.

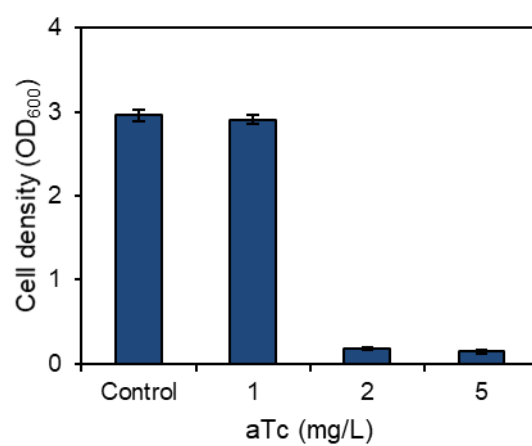

**Figure S2.** Effect of anhydrotetracycline (aTC) addition on cell growth in the JHM80 strain. Cells were grown in the absence or presence of aTC for 40 h. Error bars indicate standard deviations of two independent experiments.

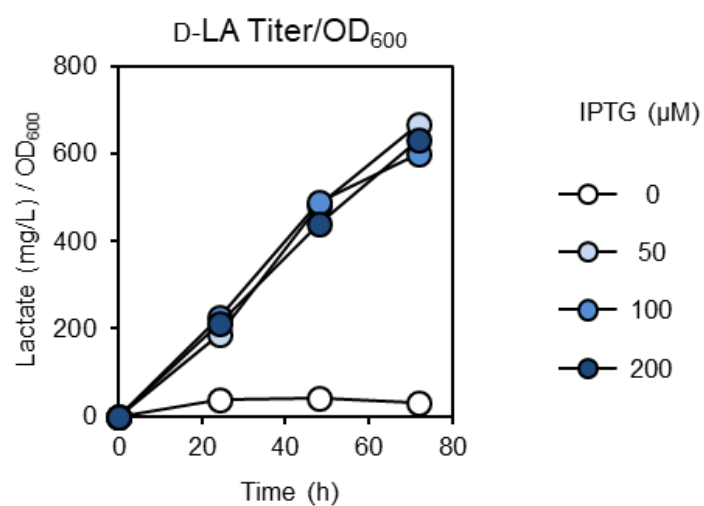

**Figure S3.** The relative amount of D-LA titer, calculated as the ratio of LA concentrations to OD<sub>600</sub> values, based on the data shown in Figure 1C.

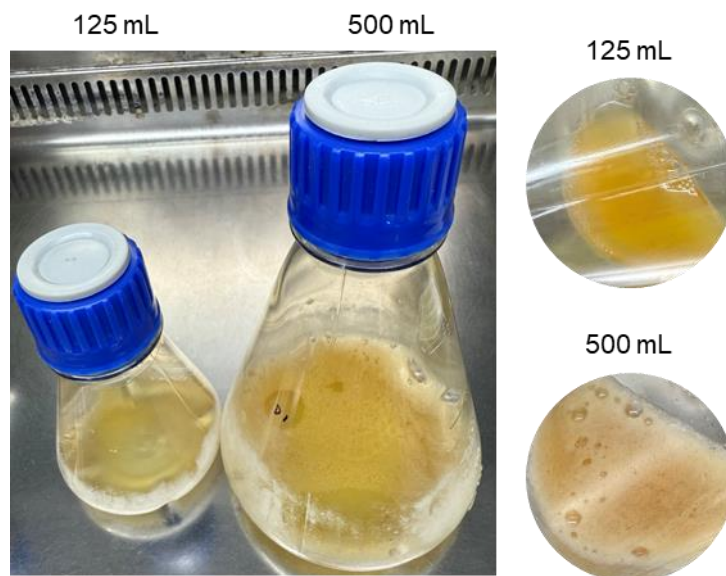

**Figure S4.** Effect of scale-up flask size on foam formation. Photographs of each flasks are shown together (left) and in closed-up (right). *Methylomonas* sp. DH-1 cells were grown in 125 mL or 500 mL flasks containing 12.5 mL or 50 mL of NMS media, respectively.

## Supplementary References

1. Lee HM, Ren J, Yu MS, Kim H, Kim WY, Shen J, et al. Construction of a tunable promoter library to optimize gene expression in *Methylobacterium* sp. DH-1, a methanotroph, and its application to cadaverine production. *Biotechnol Biofuels*. 2021;14(1):228.
